# Supplementary material for: Herpesvirus latent infection promotes stroke via activating the OTUD1/NF-κB signaling pathway
Source: Aging (Albany NY). 2023 Sep 9;15(17):8976–92. doi: 10.18632/aging.205011 (PMC10522389; doi:10.18632/aging.205011)
Supplement: Supplementary File 1 [file aging-15-205011-s001.xlsx]

## Sheet: Supplementary File 1
Supplementary File 1. Baseline characteristics of the included studies.
varicella-zoster-virus/Herpes zoster (HZ)
Literature number	First author/ Publication year	Location	Study design	Years of study	Age of study population	Population size	Subjects with outcome [or exposure for case-control studies]	Result Type
1	Horev, 2023	southern Israel	Cohort	2001-2018	Adults≥ 18 yr, 45.7±18.1	Exposed= 20965 Unexposd= 20965 up to 17 yr	Exposed= 364, 88.7% ± 0.03 Unexposd= 318, 94.0% ± 0.02	Stroke 1-yr: HR 0.78 (95% CI:0.50-1.21) 5-yr: HR 1.04 (95% CI:0.83-1.31) 15-yr: HR 1.13 (95% CI:0.93-1.37)
2	Marais, 2022	South Africa	Case control	2010-2013	18-45 yr	Cases= 69 Controls= 18 3-yr follow-up	Cases= 65 Controls= 16	VZV IgG/DNA, OR 2.031 (95% CI:0.341-12.085) [calculated by author]
3	Liao, 2017	Taiwan	Cohort	2000-2011	Adults≥ 18 yr	HZ= 2744 Non HZ= 5475	Exposed= 116, 4.2% Unexposed= 186, 3.4%	0-90d: HR 2.30 (95%CI 1.13-4.69) 91-365d: HR 1.05 (95%CI 0.58-1.90) 366-730d: HR 1.16 (95%CI 0.70-1.92) >730d: HR 1.18 (95%CI 0.86-1.64)
4	Schink, 2016	Germany	Self-controlled case-series (SCCS)	2004-2011	72.6±10.6	N= 6035	N= 352 3-mo follow-up	3 mo IRR 1.29 (95% CI:1.16-1.44) <2 wk: 1.30 (1.00-1.68) wk 3–4: IRR 1.52 (1.20-1.91) mo 2–3: IRR 1.24 (1.08-1.42) mo 4–6: IRR 1.09 (0.97-1.24) mo 7–12: IRR 0.96 (0.87-1.06)
5	Calabrese, 2017	United States	Cohort	2006-2013	Adults≥ 65 yr	N= 43527	N= 680	0-90d: IRR 1.36 (1.10-1.68) 91-365d: IRR 1.18 (1.00-1.40) Baseline: 366-730days
6	Sundstrom, 2015	Sweden	Cohort	2008-2010	No age restrictions	General population= 4,707,885 Exposed= 13296 1-yr follow-up	Exposed= 111	IRR 1.34 (95% CI 1.12-1.62)
7	Sreenivasan, 2013	Denmark	Cohort	1995-2008	Adults (≥18yr)	N= 4,620,980 Exposed= 117,926	N= 230341, 5.0%. Exposed: 4876/117926, 4.1%	< 14 days: IRR 2.27 (95%CI 1.83-2.82) 14 days-1 yr: IRR 1.17 (95%CI 1.09-1.24) > 1 yr: IRR 1.05 (95%CI 1.02-1.09)
8	Kang, 2009	Taiwan	Cohort	1997-2001	46.7±15.6	Exposed= 7760 Unexposed= 23,280 1-yr follow-up	Exposed= 133, 1.7% Unexposed= 306, 1.3%	1-yr: HR 1.31 (95% CI 1.06–1.60)
Multiple herpesviruses infections
Literature number	First author/Publication year	Location	Study design	Years of study	Age of study population	Population size	Subjects with outcome [or exposure for case-control studies]	Result Type
9	Elkind, 2016	US, Canada, Australia, Philippines, Chile, United Kingdom, France, Serbia, and China	Case control	2010-2014	29 d-18 yr	Cases= 326 Controls= 115	Past infection: HSV1/2: Cases: 53, 16.3%; controls 24, 20.9% CMV: Cases: 95, 29.1%; controls 42, 36.5% EBV: Cases: 176, 54.0%; controls 58, 50.4% VZV: Cases: 182, 55.8%; controls 68, 59.1%; acute infection: HSV1/2: case: 80,24.5%;control:19,16.5%; HSV1: case: 32,9.8%; control:4,3.5%; HSV indeterminate: case:48,14.7%;control:15.13%; VZV:case:37,11.3%;3,2.6%; CMV: case:18.5.5%;2,1.7%; EBV:case:4,1.…	Past infection:HSV1/2: OR 0.78 (95% CI 0.45–1.35)CMV: OR 0.74 (95% CI 0.47–1.17)EBV: OR 1.26 (95% CI 0.82–1.95)VZV: OR 0.93 (95% CI 0.60–1.44) Acute Infection:HSV1/2: OR 1.68 (95% CI 0.98–3.00)HSV1:OR 3.42 (95% CI 1.31–11.8)HSV indeterminate: OR 1.23 (95% CI 0.67–2.37)CMV: OR 2.85 (95% CI 0.79–18.2)EBV: OR 1.44 (95% CI 0.21–28.4)VZV: OR 4.43 (95% CI 1.55–18.7)
10	Sealy-Jefferson, 2013	United States	Cohort	1998-2008	60–101 yr	N= 1621 CMV: 979 (60.4%) VZV: 45 (2.8%) HSV-1: 1014 (62.6%)； up to 10 yr	CMV: Exposed: 97 (9.9%); Unexposed: 67 (10.4%) VZV: Exposed: 36 (12.0%); Unexposed: 128 (9.7%) HSV-1: Exposed: 94 (9.3%); Unexposed: 70 (11.5%)	IgG in the 75th versus 25th percentile CMV: OR 0.81 (95% CI 0.58, 1.12) VZV: OR 0.93 (95% CI 0.71, 1.20) HSV-1: OR 0.77 (95% CI 0.56, 1.07)
11	Al-Ghamdi, 2012	Saudi Arabia	Case control	NA	Age not specified	Cases= 20 Controls= 15	HSV-1 cases: n= 20, 100%; controls n= 14, 93.9% CMV Cases: n= 9,45%; controls n= 3, 20%. EBV cases: n= 18, 90%; controls n= 14, 93.3%.	HSV-1: OR 2.86 (95% CI 0.09–91.16) CMV: OR 3.27 (95% CI 0.70–15.29) EBV: OR 0.64 (95% CI 0.05–7.83) [calculated by author]
12	Elkind, 2010	United States	Cohort	1993-2001	Adults> 39 yr	N= 1625 Median follow-up 7.6yr (IQR: 6.4–9.0) CMV: 1388 (85.4%) HSV-1: 1402 (86.3%) HSV-2: 928 (57.1%)	Overall: 67 strokes	CMV IgG: HR 2.19 (95% CI 0.84–5.70) HSV-1 IgG: HR 1.35 (95% CI 0.59–3.07) HSV-2 IgG: HR 1.59 (95% CI 0.91–2.76)
13	Kis, 2007	Hungary	Case_x0002_control	2003	Case: 32-65 yr Control: 22-76 yr	Cases= 59 Controls= 52	CMV DNA—Cases: n= 1, 1.7%; Controls: n= 0, 0% CMV IgM—Cases: n= 0, 0%; Controls: n= 0, 0% CMV IgG—Cases: n= 26, 44.1%; Controls: 11, 21.2% HSV-1 IgA—Cases: n= 24, 40.7%; Controls: n= 8, 15.7% HSV-1 IgG—Cases: n= 23, 39.0%; Controls: n= 14, 27.4% EBV IgG—Cases: n= 22, 37.3%; Controls: n= 15, 28.8% HHV-6 IgG—Cases: n= 19, 32.2%; Controls; n= 18, 34.6%	CMV IgG：2.94 (1.27-6.81)；HSV-1 IgA：3.68 (1.47-9.20)； [below calculated by authors—unadjusted] CMV DNA: OR 2.69 (95% CI 0.11–67.53)1 CMV IgM: OR 0.88 (95% CI 0.01–45.2) HSV1 IgG: OR 1.73 (95% CI 0.77–3.88) EBV IgG: OR 1.46 (95% CI 0.66–3.26) HHV-6 IgG: OR 0.90 (0.41–1.98)
