# Supplementary material for: Herpesvirus latent infection promotes stroke via activating the OTUD1/NF-κB signaling pathway
Source: publisher site journal article supplement (doi:10.18632/aging.205011), 2023-09-09
Supplement: Supplementary file [file aging-v15i17-205011-supplementary-material-SD2.pdf]

**SUPPLEMENTARY FIGURE**

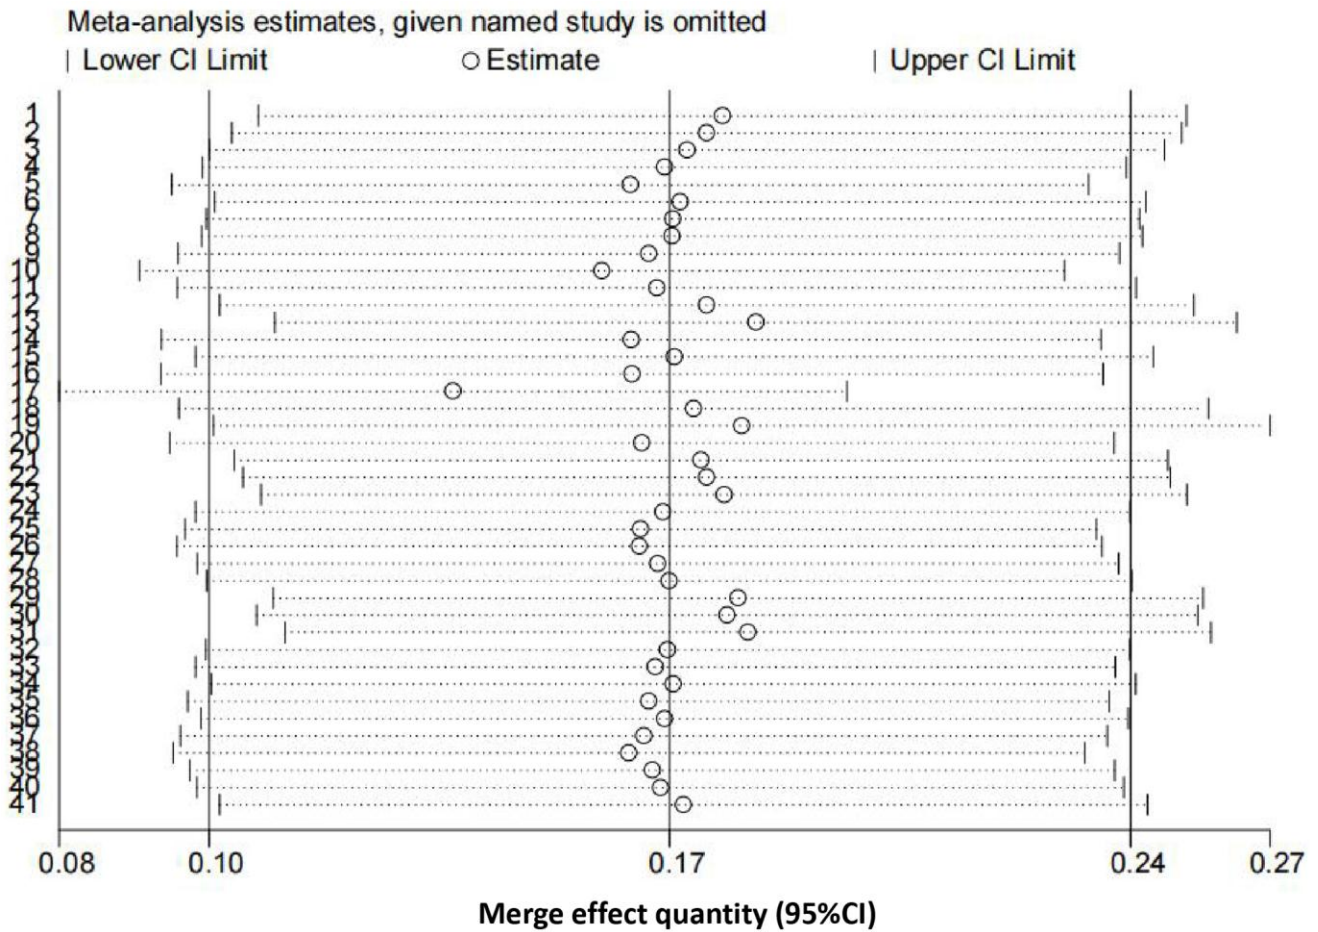

**Supplementary Figure 1. Influence of individual studies on the meta-analysis results.** Estimates within the confidence interval (0.10–0.27) indicate that the study has little difference from other studies. In all figures, OR indicates odds ratio, 95% CI indicates 95% confidence interval, %Weight indicates the weight of each study, and the vertical line in the middle of the figure represents the null line, OR = 1, indicating no statistical association between the studied factor and outcome. Each horizontal line represents the 95% CI of a given study, and if the line does not cross the null line (i.e., 95% CI does not cross 0), it indicates a statistically significant association between the studied factor and outcome. Abbreviations: yr: indicates a year; wk: indicates a week.
