# Supplementary material for: Herpesvirus latent infection promotes stroke via activating the OTUD1/NF-κB signaling pathway
Source: publisher site journal article supplement (doi:10.18632/aging.205011), 2023-09-09
Supplement: Supplementary file [file aging-v15i17-205011-supplementary-material-SD3.pdf]

## SUPPLEMENTARY TABLE

Supplementary Table 1. Differential expression of intersection genes in cerebral infarction dataset GSE22255.

| <b>ID</b> | <b>logFC</b> | <b>P. Value</b> |
|-----------|--------------|-----------------|
| OSM       | 0.8792385    | 0.01113832      |
| OTUD1     | 0.3935552    | 0.043142295     |
| NFIL3     | 0.501291     | 0.113354101     |
